# Supplementary material for: The synthesis of monomeric terminal lead aryloxides: dependence on reagents and conditions
Source: Royal Society of Chemistry journal article supplement (doi:10.1039/b707984b), 2007-01-01

## Supporting information

for

### The synthesis of monomeric terminal lead aryloxides: dependence on reagents and conditions

J. Robin Fulton,\* Peter B. Hitchcock, Nick C. Johnstone, and Eric C. Y. Tam

Figure S1. Temperature dependent NMR spectra of **3** showing the change in resonances corresponding to the (2,6-di-*t*Bu-4-MeC<sub>6</sub>H<sub>2</sub>) protons ( $T_c = 278$  K) and the *N*-(2,6-di-*i*PrC<sub>6</sub>H<sub>3</sub>) protons ( $T_c = 248$  K).

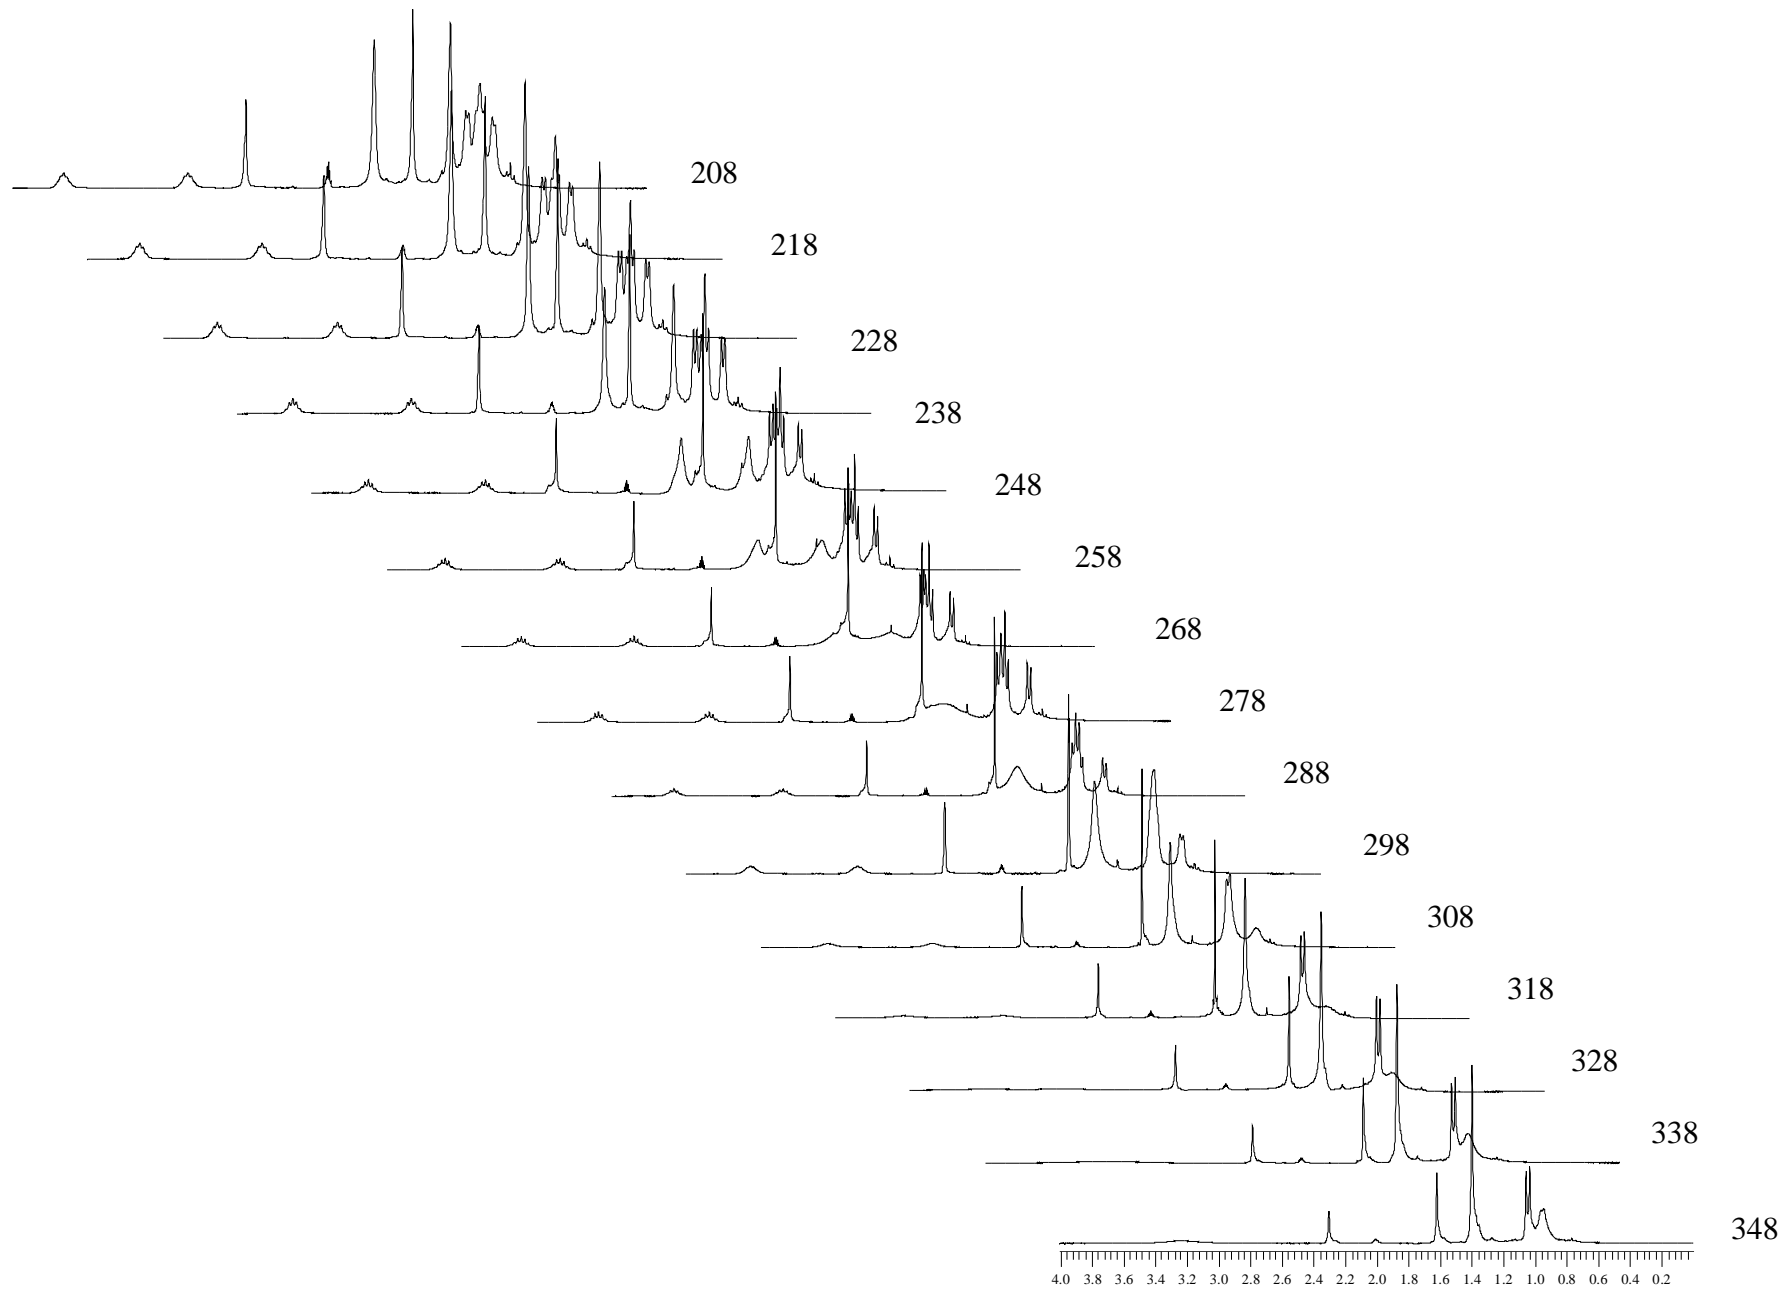

Supplement: b707984b.pdf [file b707984b.pdf]
